# Supplementary material for: Hand Dexterity Impairment in Patients with Cervical Myelopathy: A New Quantitative Assessment Using a Natural Prehension Movement
Source: PubMed Central journal article supplement (PMC6057419; doi:10.1155/2018/5138234), 2018-07-04
Supplement: 5138234.f1.pdf [file 5138234.f1.pdf]

Table S1: W-values and p-values within parenthesis from Wilcoxon rank-sum test

| Parameter                                         | Control         | Patient        |
|---------------------------------------------------|-----------------|----------------|
|                                                   |                 | Pre-op         |
| Number                                            | 30              | 23             |
| Male / Female                                     | 12/18           | 15/8           |
| Reach-to-grasp movement                           |                 |                |
| Reaction time<br>[RT] (sec)                       | 97.0<br>(0.66)  | 50.0<br>(0.54) |
| Movement time<br>[MT] (sec)                       | 108.0<br>(1.0)  | 56.0<br>(0.82) |
| Maximum grip aperture<br>[MGA] (cm)               | 105.0<br>(0.92) | 40.0<br>(0.21) |
| Time of maximum grip aperture<br>[ToMGA] (ms)     | 98.0<br>(0.69)  | 38.0<br>(0.23) |
| Position of maximum grip aperture<br>[PoMGA] (cm) | 77.0<br>(0.20)  | 56.0<br>(0.82) |
| Normalized movement distance<br>[NMD]             | 81.0<br>(0.26)  | 50.0<br>(0.54) |
| Grip force (N)                                    |                 |                |
| Sandpaper                                         | 64.0<br>(0.07)  | 47.0<br>(0.42) |
| Suede                                             | 62.0<br>(0.054) | 53.0<br>(0.67) |
| Silk                                              | 66.0<br>(0.08)  | 54.0<br>(0.72) |
| JOA score                                         |                 |                |
| Motor function of fingers                         | –               | 53.0<br>(0.67) |
| Sensory function of upper extremity               | –               | 43.5<br>(0.30) |
| Total (motor + sensory)                           | –               | 47.5<br>(0.44) |

Table S2: D-values and significances from Kolmogorov-Smirnov goodness-of-fit test

| Parameter                                         | Control | Patient |                  |
|---------------------------------------------------|---------|---------|------------------|
|                                                   |         | Pre-op  | Post-op          |
| Number                                            | 30      | 23      | 15               |
| Male / Female                                     | 12/18   | 15/8    | 12/3             |
| Reach-to-grasp movement                           |         |         |                  |
| Reaction time<br>[RT] (sec)                       | 0.16    | 0.25    | 0.19<br>(0.20)   |
| Movement time<br>[MT] (sec)                       | 0.19    | 0.12    | 0.16<br>(0.11)   |
| Maximum grip aperture<br>[MGA] (cm)               | 0.16    | 0.20    | 0.26<br>(0.26)   |
| Time of maximum grip aperture<br>[ToMGA] (ms)     | 0.10    | 0.20    | 0.12<br>(0.21)   |
| Position of maximum grip aperture<br>[PoMGA] (cm) | 0.25 *  | 0.15    | 0.16<br>(0.13)   |
| Normalized movement distance<br>[NMD]             | 0.22    | 0.14    | 0.17<br>(0.20)   |
| Grip force (N)                                    |         |         |                  |
| Sandpaper                                         | 0.17    | 0.12    | 0.30<br>(0.16)   |
| Suede                                             | 0.18    | 0.11    | 0.31<br>(0.13)   |
| Silk                                              | 0.17    | 0.16    | 0.27<br>(0.22)   |
| JOA score                                         |         |         |                  |
| Motor function of fingers                         | –       | 0.18    | 0.37 *<br>(0.29) |
| Sensory function of upper extremity               | –       | 0.24    | 0.20<br>(0.32)   |
| Total (motor + sensory)                           | –       | 0.12    | 0.17<br>(0.22)   |

\*  $p < 0.05$

Values in parentheses indicate preoperative values of 15 patients.
